# Supplementary material for: On the identity of the radiation-induced stable alanine radical
Source: Royal Society of Chemistry journal article supplement (doi:10.1039/c004380j), 2010-01-01
Supplement: c004380j.pdf [file c004380j.pdf]

**On the identity of the radiation-induced stable alanine radical**Ewald Pauwels<sup>1\*</sup>, Hendrik De Cooman<sup>1</sup>, Michel Waroquier<sup>1</sup>, Eli O. Hole<sup>2</sup>, Einar Sagstuen<sup>2</sup><sup>1</sup>Center for Molecular Modeling, Ghent University, Technologiepark 903, B-9052 Zwijnaarde, Belgium

QCMM - alliance Ghent-Brussels, Belgium

<sup>2</sup>Department of Physics, University of Oslo, P.O. Box 1048 Blindern, N-0316 Oslo, Norway

\*To whom all correspondence should be addressed. E-mail: ewald.pauwels@UGent.be

May 21, 2010

**Supporting Information**

Table SI-1

Isotropic and anisotropic hyperfine couplings (in MHz) and g-tensor values of the stable alanine radical (experiment) and two model structures. The last column indicates the angle (in degrees) between corresponding experimental and calculated eigenvector directions.

|                   |               | $A_{\text{iso}}/g_{\text{iso}}$ | $A_{\text{aniso}}/g_{\text{aniso}}$ | Angle            |
|-------------------|---------------|---------------------------------|-------------------------------------|------------------|
| <b>Experiment</b> | $H_{\beta}$   | 69.9                            | -2.6                                |                  |
|                   |               |                                 | -2.3                                |                  |
|                   |               |                                 | 4.8                                 |                  |
|                   | $H_{\alpha}$  | -56.1                           | -31.8                               | ref <sup>2</sup> |
|                   |               |                                 | 3.9                                 |                  |
|                   |               |                                 | 27.9                                |                  |
|                   | g             | 2.0033                          | 2.0024                              |                  |
|                   |               |                                 | 2.0034                              |                  |
|                   |               |                                 | 2.0041                              |                  |
|                   | $H(\text{N})$ | 0.2                             | -4.0                                | ref <sup>4</sup> |
| -1.7              |               |                                 |                                     |                  |
| 5.7               |               |                                 |                                     |                  |
| <b>B-1</b>        | $H_{\beta}$   | 17.8                            | -2.4                                | 60               |
|                   |               |                                 | -1.7                                | 68               |
|                   |               |                                 | 4.1                                 | 34               |
|                   | $H_{\alpha}$  | -20.6                           | -14.9                               | 86               |
|                   |               |                                 | -3.0                                | 87               |
|                   |               |                                 | 17.9                                | 28               |
|                   | g             | 2.0035                          | 2.0022                              | 39               |
|                   |               |                                 | 2.0037                              | 33               |
|                   |               |                                 | 2.0046                              | 27               |
|                   | $H(\text{N})$ | 4.3                             | -3.6                                | 87               |
| -2.9              |               |                                 | 83                                  |                  |
| 6.5               |               |                                 | 36                                  |                  |
| <b>B-2</b>        | $H_{\beta}$   | 23.3                            | -2.4                                | 59               |
|                   |               |                                 | -1.7                                | 63               |
|                   |               |                                 | 4.1                                 | 35               |
|                   | $H_{\alpha}$  | -21.6                           | -17.6                               | 90               |
|                   |               |                                 | -3.2                                | 85               |
|                   |               |                                 | 20.8                                | 27               |

---

|      |        |        |    |
|------|--------|--------|----|
|      |        | 2.0022 | 55 |
| g    | 2.0036 | 2.0039 | 59 |
|      |        | 2.0048 | 26 |
|      |        | -4.2   | 78 |
| H(N) | -2.2   | -1.0   | 51 |
|      |        | 5.2    | 80 |

---

## References

- 1 D. F. Regulla and U. Deffner, *International Journal of Applied Radiation and Isotopes*, 1982, **33**, 1101-&.
- 2 E. Sagstuen, E. O. Hole, S. R. Haugedal and W. H. Nelson, *J. Phys. Chem. A*, 1997, **101**, 9763-9772.
- 3 E. Sagstuen, A. Sanderud and E. O. Hole, *Radiat. Res.*, 2004, **162**, 112-119.
- 4 S. Kuroda and I. Miyagawa, *J. Chem. Phys.*, 1982, **76**, 3933-3944.
- 5 E. Pauwels, V. Van Speybroeck, P. Lahorte and M. Waroquier, *J. Phys. Chem. A*, 2001, **105**, 8794-8804.
- 6 T. L. Petrenko, *J. Phys. Chem. A*, 2002, **106**, 149-156.
- 7 C. Adamo, V. Barone and A. Fortunelli, *J. Chem. Phys.*, 1995, **102**, 384-393.
- 8 F. Q. Ban, S. D. Wetmore and R. J. Boyd, *J. Phys. Chem. A*, 1999, **103**, 4303-4308.
- 9 P. Lahorte, F. De Proft, G. Vanhaelewyn, B. Masschaele, P. Cauwels, F. Callens, P. Geerlings and W. Mondelaers, *J. Phys. Chem. A*, 1999, **103**, 6650-6657.
- 10 R. Declerck, E. Pauwels, V. Van Speybroeck and M. Waroquier, *Phys. Rev. B*, 2006, **74**, 8.
- 11 V. Weber, M. Iannuzzi, S. Giani, J. Hutter, R. Declerck and M. Waroquier, *J. Chem. Phys.*, 2009, **131**, 11.
- 12 H. De Cooman, G. Vanhaelewyn, E. Pauwels, E. Sagstuen, M. Waroquier and F. Callens, *Journal of Physical Chemistry B*, 2008, **112**, 15045-15053.
- 13 E. Pauwels, H. De Cooman, G. Vanhaelewyn, E. Sagstuen, F. Callens and M. Waroquier, *Journal of Physical Chemistry B*, 2008, **112**, 15054-15063.
- 14 <http://cp2k.berlios.de>.
- 15 A. D. Becke, *Phys. Rev. A*, 1988, **38**, 3098-3100.
- 16 C. T. Lee, W. T. Yang and R. G. Parr, *Phys. Rev. B*, 1988, **37**, 785-789.
- 17 M. S. Lehmann, T. F. Koetzle and W. C. Hamilton, *J. Am. Chem. Soc.*, 1972, **94**, 2657-&.
- 18 G. Lippert, J. Hutter and M. Parrinello, *Mol. Phys.*, 1997, **92**, 477-487.
- 19 J. VandeVondele and J. Hutter, *J. Chem. Phys.*, 2007, **127**, 9.
- 20 S. Goedecker, M. Teter and J. Hutter, *Phys. Rev. B*, 1996, **54**, 1703-1710.
- 21 C. Hartwigsen, S. Goedecker and J. Hutter, *Phys. Rev. B*, 1998, **58**, 3641-3662.
- 22 M. Krack and M. Parrinello, *PCCP Phys. Chem. Chem. Phys.*, 2000, **2**, 2105-2112.
- 23 N. Godbout, D. R. Salahub, J. Andzelm and E. Wimmer, *Can. J. Chem.-Rev. Can. Chim.*, 1992, **70**, 560-571.
- 24 M. Tarpan, E. Sagstuen, E. Pauwels, H. Vrielinck, M. Waroquier and F. Callens, *J. Phys. Chem. A*, 2008, **112**, 3898-3905.
- 25 R. Improta and V. Barone, *Chem. Rev.*, 2004, **104**, 1231-1253.
- 26 H. De Cooman, E. Pauwels, H. Vrielinck, E. Sagstuen, M. Waroquier and F. Callens, *Journal of Physical Chemistry B*, 2010, **114**, 666-674.
- 27 R. Declerck, E. Pauwels, V. Van Speybroeck and M. Waroquier, *Journal of Physical Chemistry B*, 2008, **112**, 1508-1514.
- 28 W. A. Bernhard, J. Barnes, K. R. Mercer and N. Mroczka, *Radiat. Res.*, 1994, **140**, 199-214.
- 29 D. M. Close, L. A. Eriksson, E. O. Hole, E. Sagstuen and W. H. Nelson, *Journal of Physical Chemistry B*, 2000, **104**, 9343-9350.
- 30 W. H. Nelson, E. Sagstuen, E. O. Hole and D. M. Close, *Radiat. Res.*, 1998, **149**, 75-86.

- 31 E. Pauwels, R. Declerck, V. Van Speybroeck and M. Waroquier, *Radiat. Res.*, 2008, **169**, 8-18.
- 32 E. Pauwels, V. Van Speybroeck and M. Waroquier, *J. Phys. Chem. A*, 2004, **108**, 11321-11332.
